# Supplementary material for: Carbonaceous nano-additives augment microwave-enabled thermal remediation of soils containing petroleum hydrocarbons
Source: Royal Society of Chemistry journal article supplement (doi:10.1039/c6en00261g), 2016-01-01
Supplement: c6en00261g1.pdf [file c6en00261g1.pdf]

## Supplementary Information

for

### **Carbonaceous Nano-Additives Augment Microwave-Enabled Thermal Remediation of Soils Containing Petroleum Hydrocarbons**

Onur G. Apul<sup>1\*</sup>, Anca G. Delgado<sup>2</sup>, Justin Kidd<sup>1</sup>, Fabiha Alam<sup>2</sup>, Paul Dahlen<sup>1</sup>, Paul Westerhoff<sup>1</sup>

<sup>1</sup> *Arizona State University School of Sustainable Engineering and the Built Environment, PO Box 873005, Tempe, AZ 85287-3005.*

<sup>2</sup> *Arizona State University, Biodesign Institute, Swette Center for Environmental Biotechnology, PO Box 875701, Tempe, AZ 85287-5701.*

\*Corresponding author: email: [oapul@asu.edu](mailto:oapul@asu.edu); phone: +1-480-727-2913; fax: +1-480-965-2885

### **Biodegradation Procedure for Soils Containing Petroleum Hydrocarbons**

Soil was biodegraded in a 1.5 L glass pan containing 1.25 kg of soil. Each kg of soil was dosed with 10 mL of macronutrient solution, 1 mL Trace A solution, 1 mL Trace B solution, and 1 mL vitamin mix solution for bacterial growth. The composition of these solutions was published previously <sup>S1</sup>. The soil was mixed/tilled twice weekly to oxygenate, and DI water was provided to maintain the moisture content at 60-80% of the soil water holding capacity (i.e, 15-18% w/w). Incubations were performed for 120 days at 30° C in the dark.

### **Extraction and Quantification of Total Petroleum Hydrocarbons from Soil**

One gram of soil was dried with sodium sulfate and extracted with dichloromethane (DCM) in a Gerhardt<sup>®</sup> Soxtherm automatic extractor (Gerhardt Analytical System, Königswinter, Germany). The DCM extract was concentrated to 1 mL final volume, filtered through a 0.2- $\mu$ m PTFE filter, and analyzed on a GC-FID (Shimadzu GC2010, Shimadzu Corp., MD, USA) equipped with a Restek Rxi<sup>®</sup>-1HT column (30 m x 0.25 mm x 0.25  $\mu$ m). The GC-FID analytical method was developed according to the extractable petroleum hydrocarbons standard method <sup>S2</sup>. TPH was defined as the collective concentration of all compounds eluting from n-nonane (C<sub>9</sub>) to n-tetracontane (C<sub>40</sub>). Calibration curves were generated to obtain calibration factors using an alkane C<sub>9</sub>-C<sub>40</sub> standard mixture (Sigma-Aldrich Co. Ltd.; St. Louis, MO) at six different concentrations between 2 and 200 mg/L. All TPH concentrations were reported per dry weight of the soil.

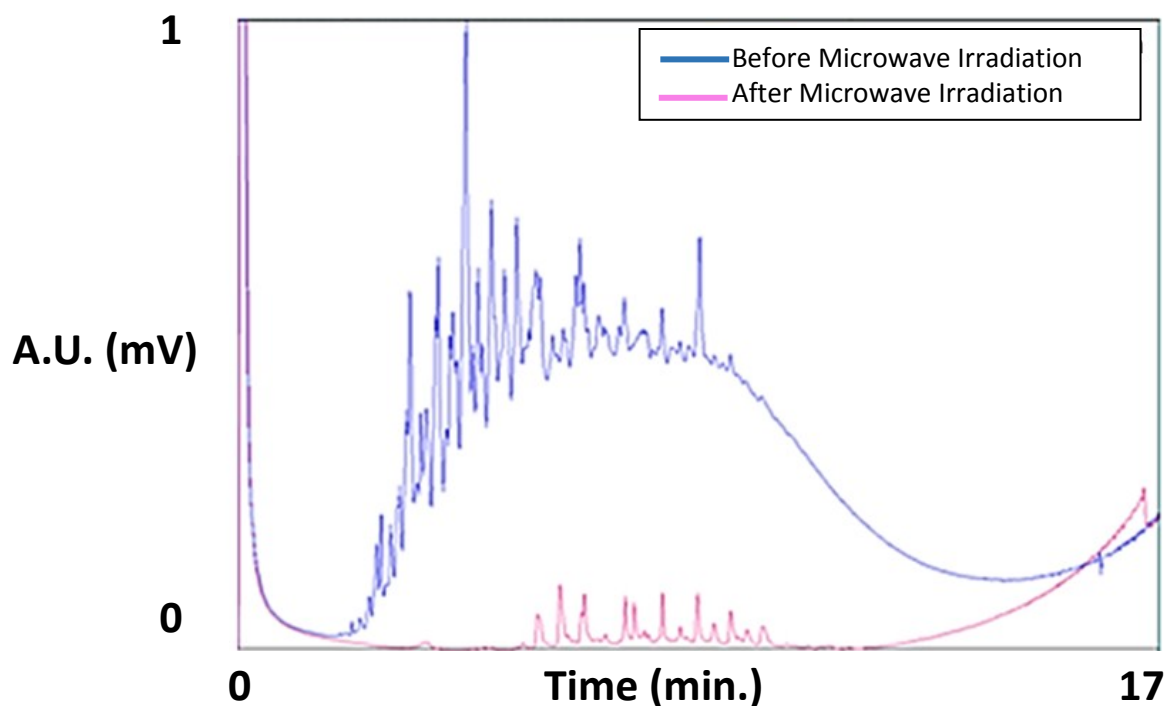

**Figure S1.** Chromatograms of soils containing petroleum hydrocarbons before and after 15 minute microwave irradiation enhanced with granular activated carbon. Microwave treatment of soils using granular activated carbons as additives: two grams of contaminated soil (containing 14,000 mg/kg TPH, 12.5% soil moisture) were placed into a 40 ml borosilicate VOA vial. Calgon granular activated carbon (10% w/w) was added to the soil matrix and manually mixed to ensure sample homogeneity. The vials were placed on a rotator disk in a household Hamilton Beach (Glen Allen, VA; Model No: P100N30ALS3B, 2.45 GHz, 1000-W output) microwave oven in a laboratory hood and set to 15 minutes. Residual TPH chromatograms were generated in-house using SRI 8610C Gas Chromatograph with Restek MXT-1HT SimDist column (10m, 0.53 mmID, 0.21  $\mu$ m df). Temperature programming was: 40-380 °C at 20 °C/min (total 17

minute run time) with gas flow rates of helium carrier 10 ml/min, hydrogen 20 ml/min, and air 230 ml/min.

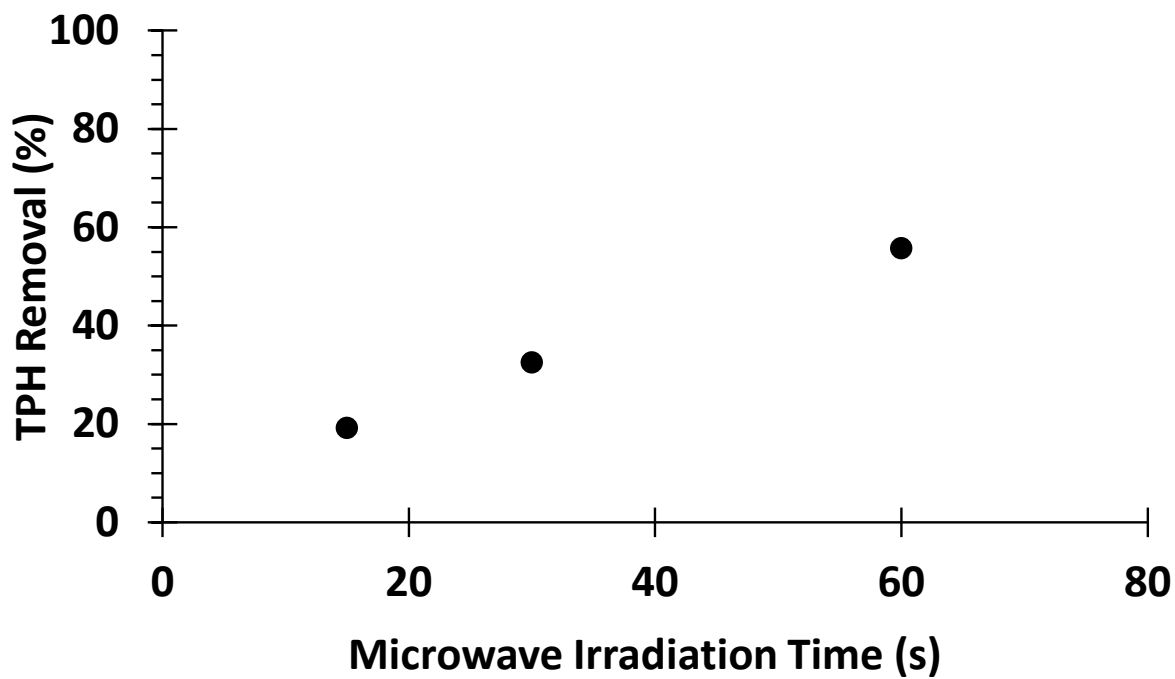

**Figure S2.** Effect of microwave irradiation time on TPH removal using MWCNT-1 (1% w/w) as dielectric additive.

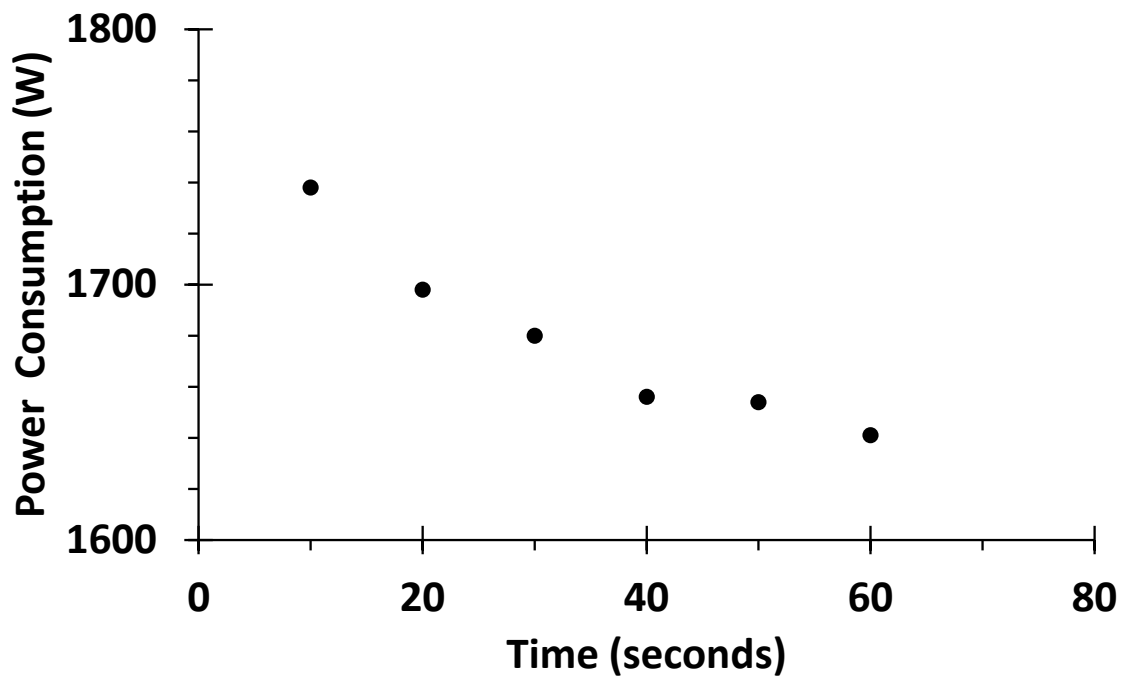

**Figure S3.** The online power measurements of the microwave oven when it was set to run for 60-seconds with no power adjustment.

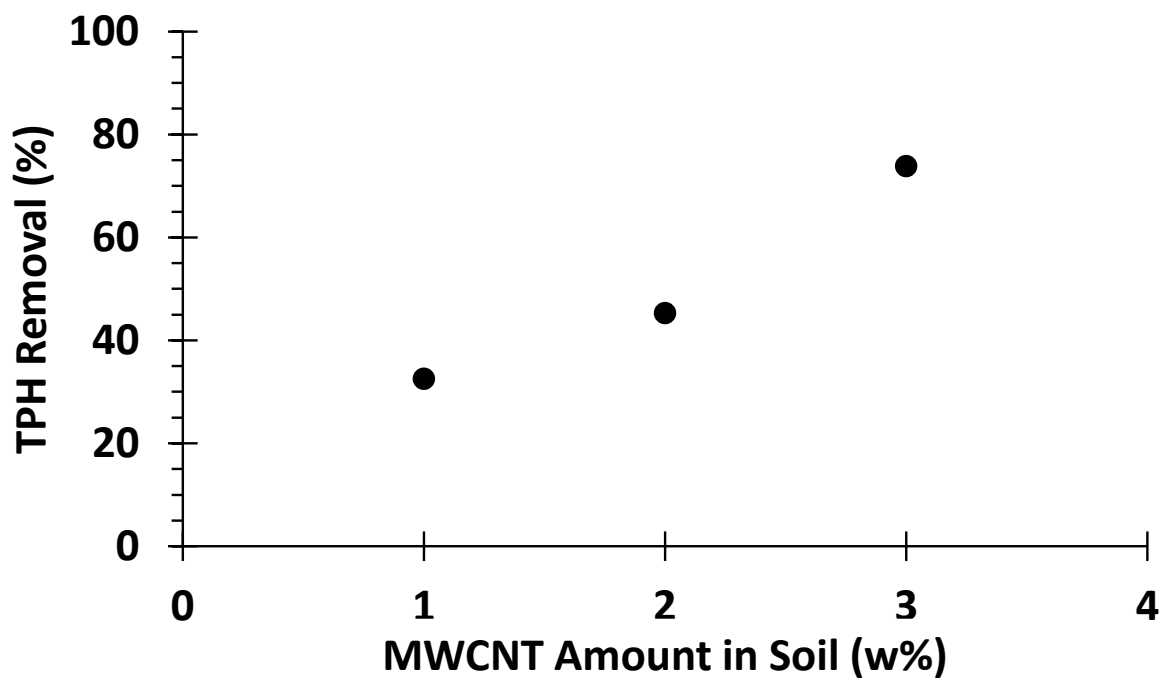

**Figure S4.** Effect of dielectric additive (MWCNT-1) amount on TPH removal. Thirty-second microwave irradiation was applied to all samples.

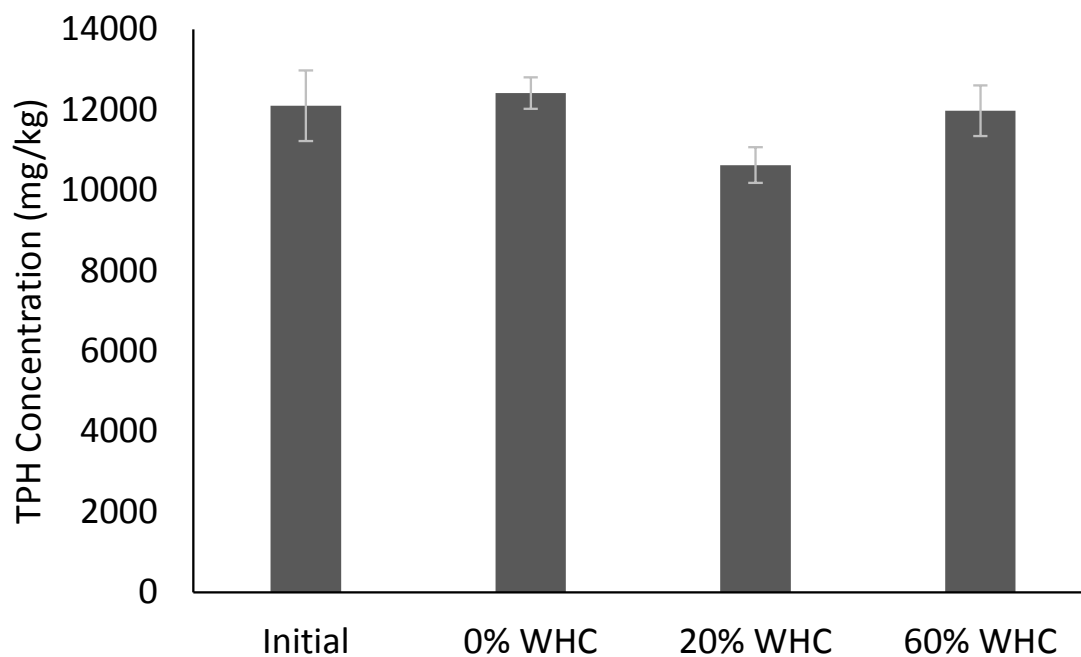

**Figure S5.** Effect of moisture content, reported as soil water holding capacity (WHC), on TPH removal after 60 second microwave irradiation with MWCNT-2 as the additive. Error bars indicate standard deviation of triplicate experiments.



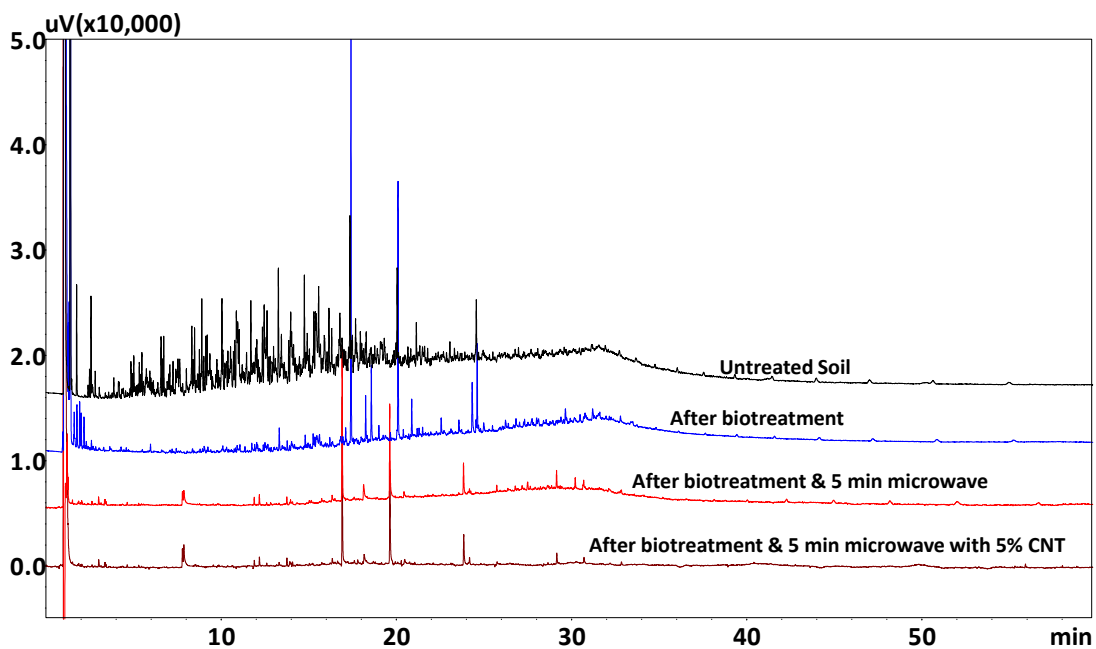

**Figure S6.** Chromatograms of TPH-containing soils after biotreatment and consecutive microwave treatment with and without carbon nanotubes. The baseline is shifted along the y-axis to allow better visual comparison.

## REFERENCES

- S1- A.G. Delgado, D. Fajardo-Williams, S.C. Popat, C.I. Torres, R. Krajmalnik-Brown. Successful operation of continuous reactors at short retention times results in high-density, fast-rate *Dehalococcoides* dechlorinating cultures. *Appl. Microbiol. Biotechnol.*, 2014, 98, 2729-2737.
- S2- MADEP (Massachusetts Department of Environmental Protection) Method for the Determination of Extractable Petroleum Hydrocarbons (EPH). May 2004.
